# Supplementary material for: Above and belowground phenotypic response to exogenous auxin across Arabidopsis thaliana mutants and natural accessions varies from seedling to reproductive maturity
Source: PeerJ journal article supplement (doi:10.7717/peerj.16873), 2024-02-09
Supplement: Supplementary_Materials_SydowMurrenR1.pdf [file Supplementary_Materials_SydowMurrenR1.pdf]

## Supplemental Materials

*Supplement S1: Additional data from publicly available databases on variation in APA of genes selected for study.*

**Table S1 - Polyadenylation information for select auxin related genes and their respective SALK T-DNA insert mutant lines with gene information adapted from Hong et al. 2018.**

| Gene Type                  | Gene Family                    | Gene  | Locus     | PA Site Number | PA Group | SALK Line    |
|----------------------------|--------------------------------|-------|-----------|----------------|----------|--------------|
| Auxin Signal Transduction  | Auxin Binding Protein          | ABP1  | AT4G02980 | 4              | >2       | SALK_208329C |
| Auxin Signal Transduction  | Auxin Signaling F Box Protein  | AFB3  | AT1G12820 | 1              | 1+2      | SALK_068787C |
| Auxin Signal Transduction  | Auxin Response Factor          | ARF1  | AT1G59750 | 2              | 1+2      | SALK_079046C |
| Auxin Signal Transduction  | Auxin Response Factor          | ARF11 | AT2G46530 | 4              | >2       | SALK_063778C |
| Auxin Signal Transduction  | Auxin Response Factor          | ARF14 | AT1G35540 | 0              | 0        | SALK_049581C |
| Auxin Signal Transduction  | Auxin Response Factor          | ARF21 | AT1G34410 | 0              | 0        | SALK_020702C |
| Auxin Signal Transduction  | Auxin Response Factor          | ARF4  | AT5G60450 | 3              | >2       | SALK_070506C |
| Auxin Signal Transduction  | Indole-3-Acetic Acid Inducible | IAA15 | AT1G80390 | 0              | 0        | SALK_150265C |
| Auxin Signal Transduction  | Indole-3-Acetic Acid Inducible | IAA33 | AT5G57420 | 0              | 0        | SALK_134724C |
| Auxin Signal Transduction  | Indole-3-Acetic Acid Inducible | IAA5  | AT1G15580 | 2              | 1+2      | SALK_112553C |
| Auxin Signal Transduction  | Indole-3-Acetic Acid Inducible | IAA8  | AT2G22670 | 1              | 1+2      | SALK_202296C |
| Auxin Transport            | Like Auxin Resistant           | LAX2  | AT2G21050 | 1              | 1+2      | SALK_208379C |
| Auxin Transport            | PIN-Formed                     | PIN7  | AT1G23080 | 3              | >2       | SALK_048791C |
| Auxin Transport            | PIN-Formed                     | PIN8  | AT5G15100 | 0              | 0        | SALK_204263C |
| Auxin Synthesis Metabolism | SuperRoot                      | SUR1  | AT2G20610 | 1              | 1+2      | SALK_113460C |

We gathered genome annotation data from Araport11 (Cheng et al. 2017), polyadenylation cluster location data from the PlantAPAdb (Zhu et al. 2020), and T-DNA insert location data from T-DNA Express (signal.salk.edu) to visualize the variation across loci of interest.

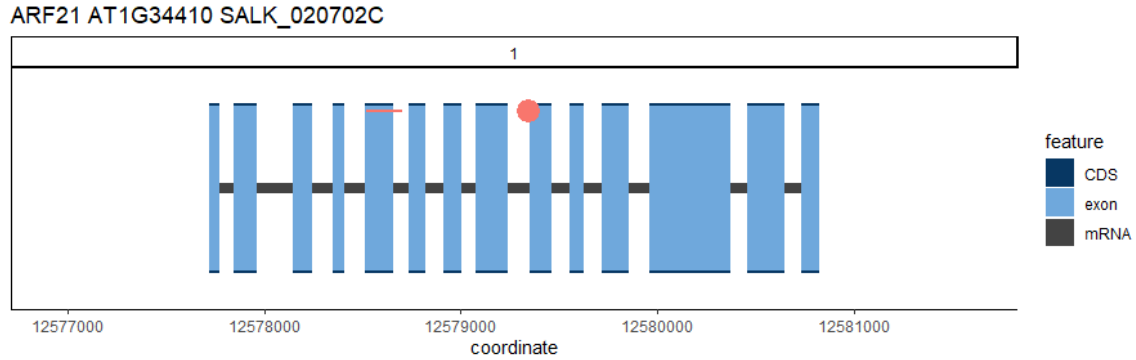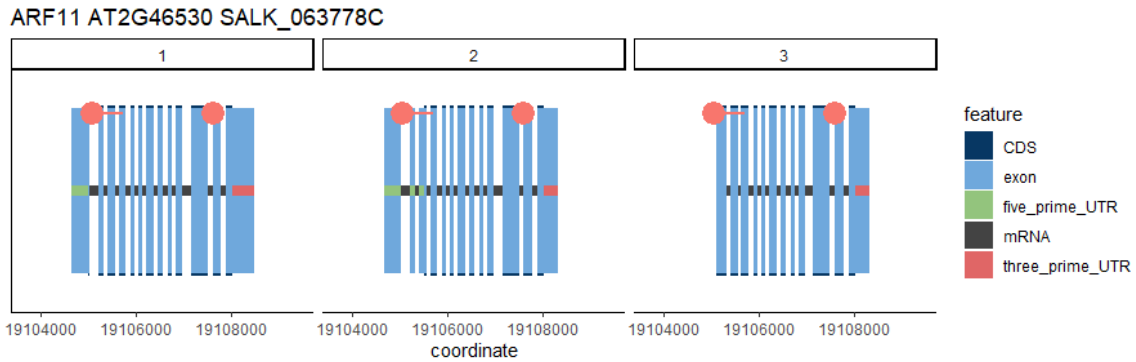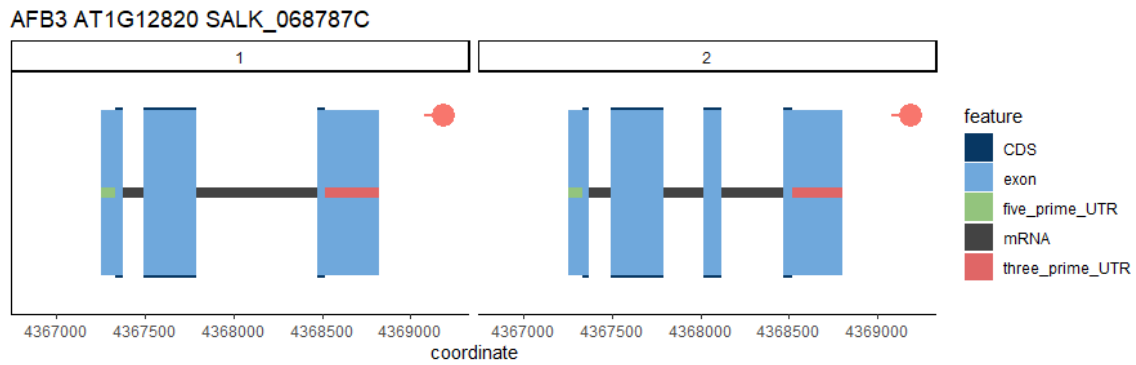

LAX2 AT2G21050 SALK\_208379C

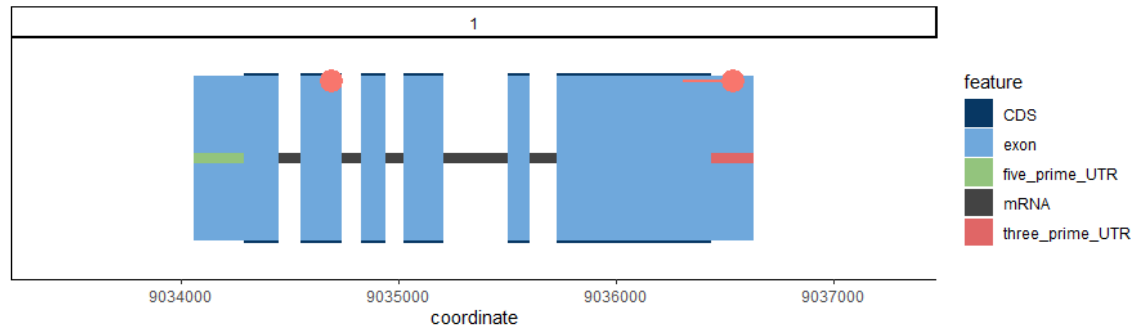

ABP1 AT4G02980 SALK\_208329C

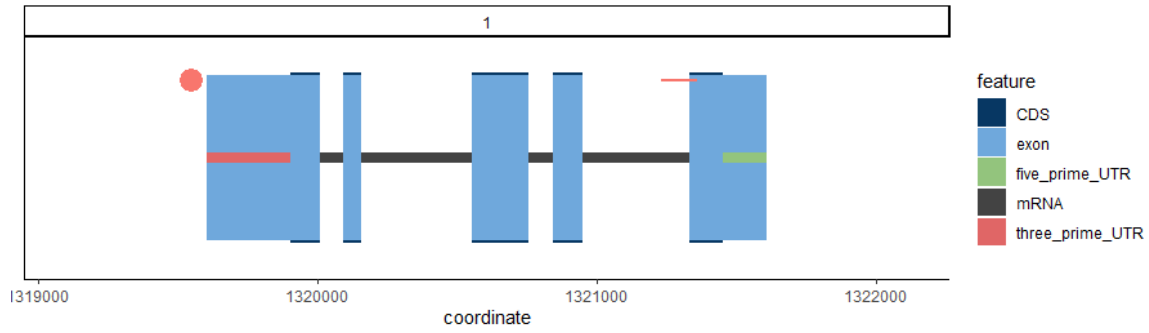

IAA5 AT1G15580 SALK\_112553C

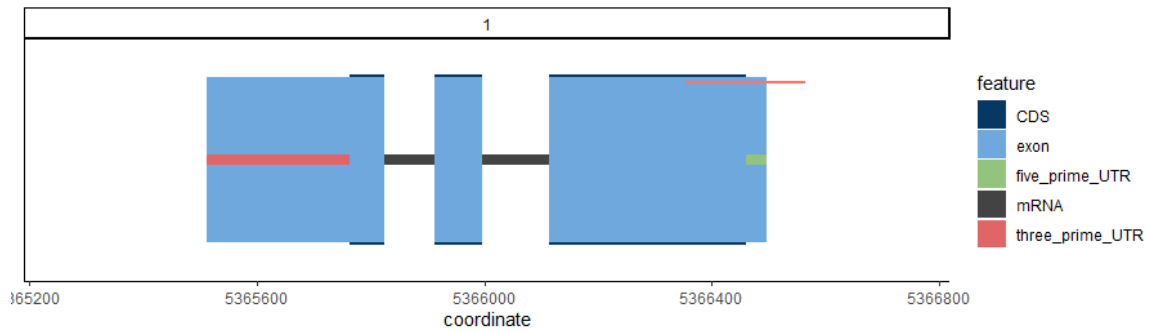

PIN8 AT5G15100 SALK\_204263C

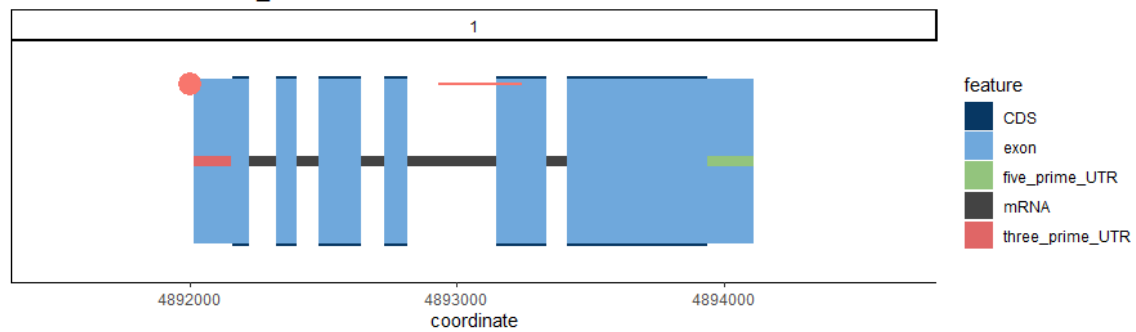

SUR1 AT2G20610 SALK\_113460C

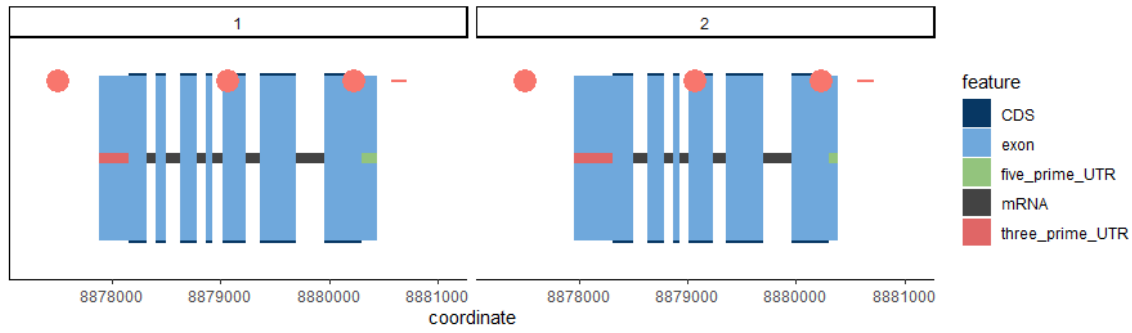

IAA15 AT1G80390 SALK\_150265C

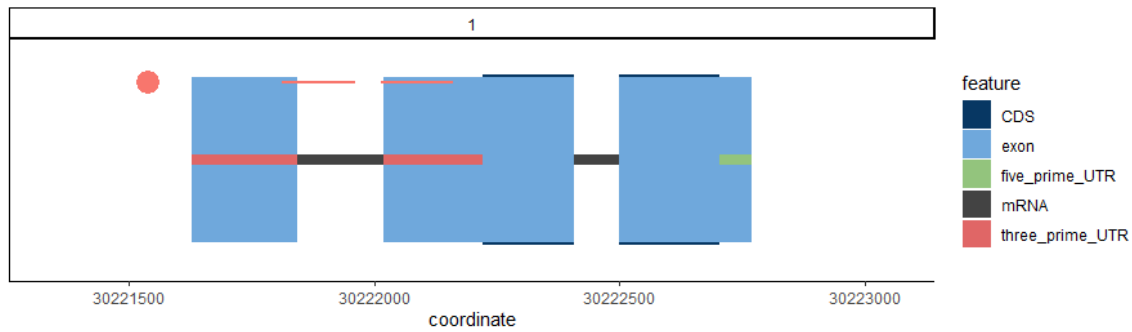

IAA8 AT2G22670 SALK\_202296C

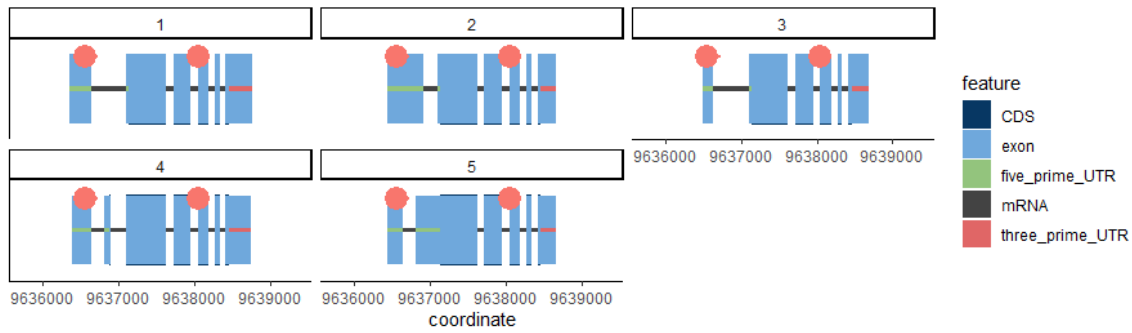

ARF14 AT1G35540 SALK\_049581C

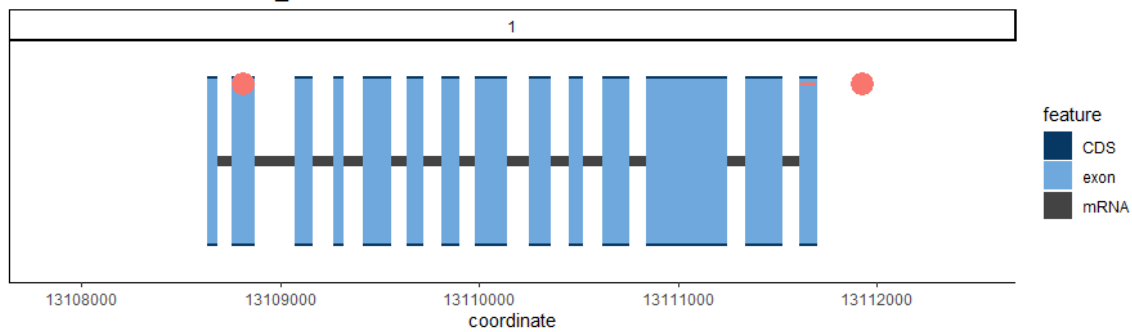

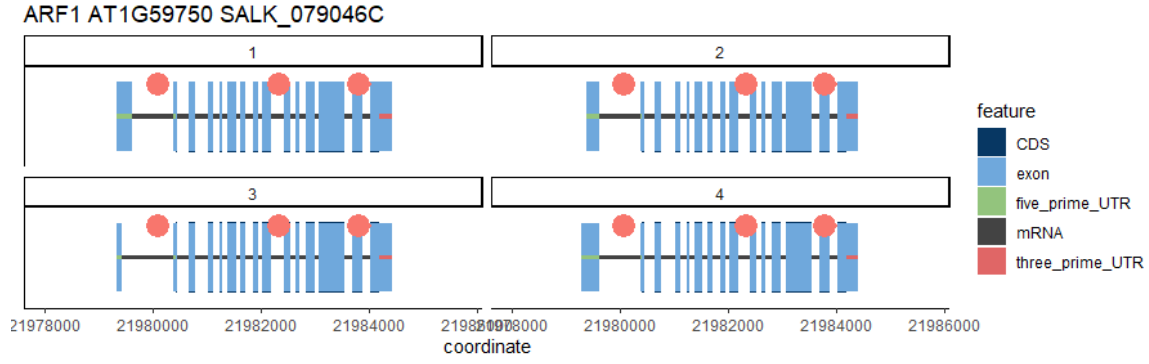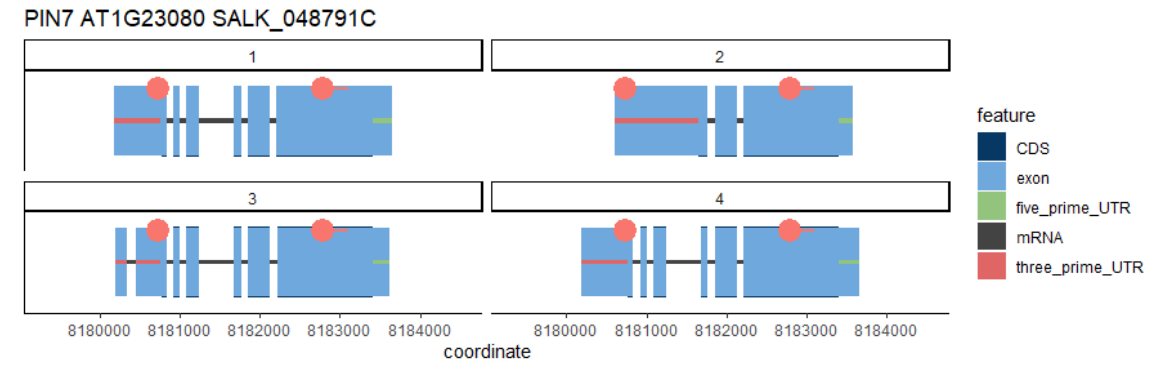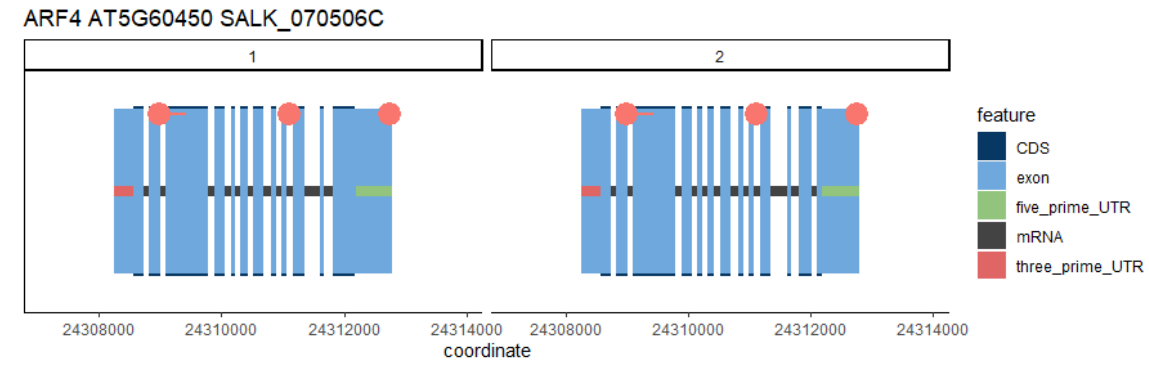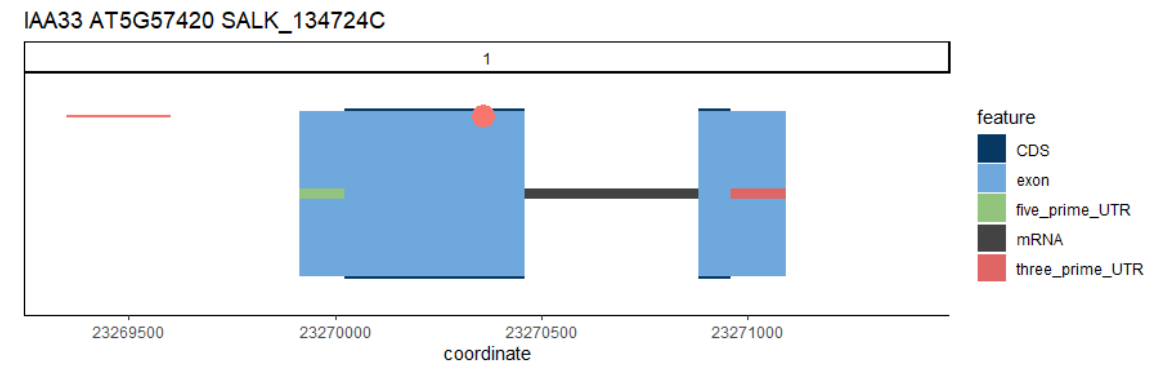

**Figure S1 - Annotated transcripts of focal genes in the study.** Titles of plots include the gene name, its locus, and corresponding SALK insert mutant line available in TAIR11. Different plots underneath the same gene, locus, and SALK line represent different transcripts described in the Araport11 genome annotation. Pink circles represent polyadenylation clusters recognized by studies within the PlantAPAdb. Pink lines represent the location of SALK T-DNA inserts. Multiple inserts within one annotation represent multiple inserts detected at the SALK institute. The lines used for this investigation, however, have been confirmed by unPAK (See Rutter et al. 2019) to be homozygous single inserts.

*Supplement S2: Synthesis of Existing Auxin Root Assay Literature*

We searched the Web of Science database in September 2020 using the search term “lateral root development gene auxin” to obtain articles studying the role of auxin in lateral root development in the window from 1980 – Sept 2020. We then completed a set of filters (Figure S1) based on a series of criteria. Papers were retained if they mentioned lateral roots within the abstract and if they noted the specific loci of genes studied. Our goal for quantitative synthesis of publications was to determine the developmental stage at which the genes frequently studied in the literature, the substrate in which plants were grown, the age at which roots were phenotype, and the method and traits used for root phenotyping.

The results of this synthesis informed our methods by identifying gaps in the literature in the developmental stage of root assays. Lateral root traits of auxin-related mutants were measured after a mean of 11 days (SD=5.0; Fig. S3), with 94% of studies growing plants on an agar substrate (Fig. S4). These findings guided our choices in determining when plants were examined (14d, 21d, and maturity) and the substrates on which they were grown (sand and potting mix).

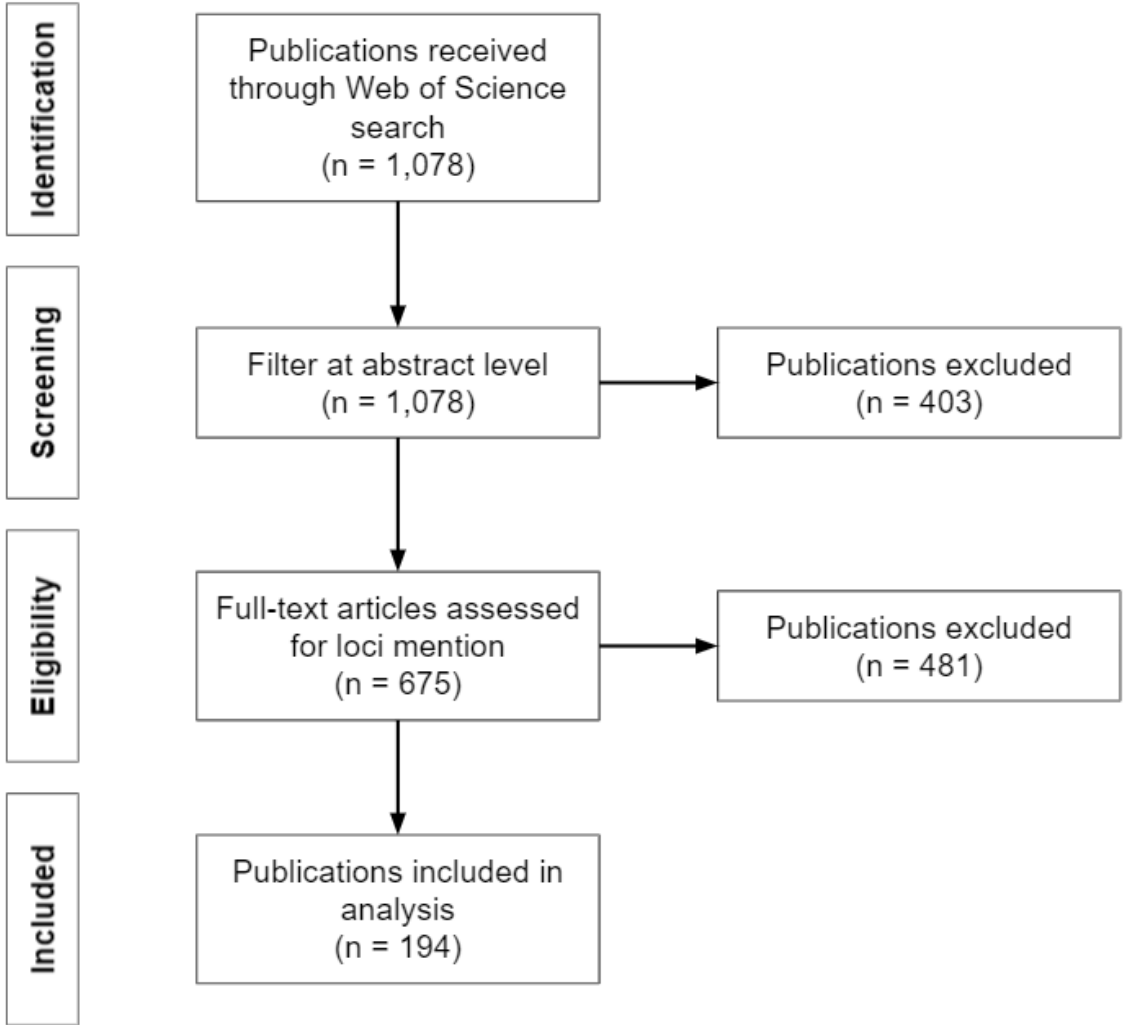

**Figure S2 - Flow chart diagram of literature identification, screening and selection adapted from (Duenas et al. 2021) based on PRISMA (Preferred Reporting Items for Systematic Reviews and Meta-Analyses) guidelines (Moher et al. 2009).**

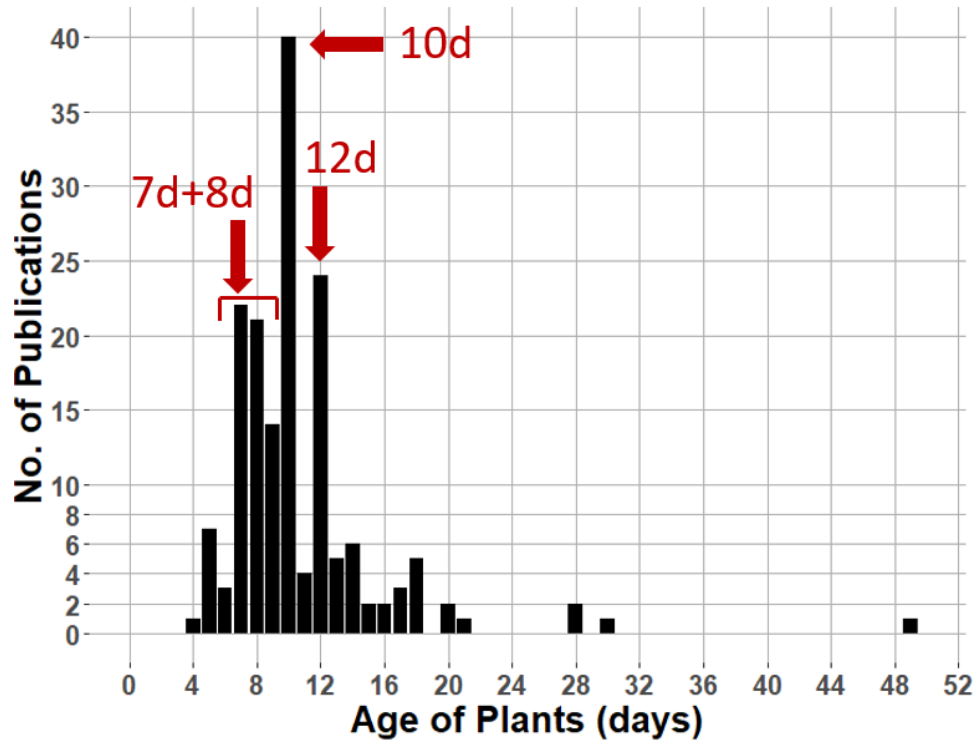

**Figure S3 - Time of lateral root measurements noted in the publications from the quantitative synthesis of the literature (n=166, mean days old plant = 10.8, +/- 1 SD=5.03).**

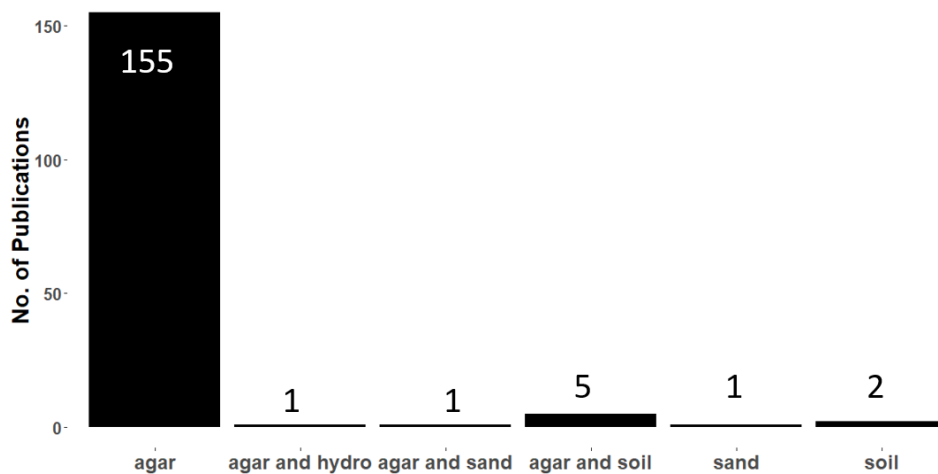

**Figure S4 - Frequency substrates (media) used across publications (n=166) in the**



**Table S2 - Analysis of variance examining the fixed effects of hormone treatment, genotype, and their interaction in 14d SALK insert mutant seedlings.** Values are F-statistic results of linear models, and significance levels are indicated by  $p < 0.001 = ***$ ,  $p < 0.01 = **$ ,  $p < 0.05 = *$ ,  $p > 0.05 = ns$  with exact p-values noted in parentheses. Belowground mass and LR density have been square root transformed and aboveground mass log-transformed to meet ANOVA assumptions.

| <b>Fixed Effect</b>         | <b>Rosette Diam.</b> | <b>Root Length</b> | <b>Below Mass</b>   | <b>Above Mass</b>    | <b>LR Density</b>        |
|-----------------------------|----------------------|--------------------|---------------------|----------------------|--------------------------|
| Treatment<br>df=1           | 22.3***<br>(5.5e-06) | 11.2**<br>(0.0011) | 4.3*<br>(0.041)     | 32.8***<br>(6.1e-08) | 97.4***<br>( $< 2e-16$ ) |
| Genotype<br>df=14           | 4.5***<br>(1.2e-06)  | 2.6**<br>(0.0023)  | 3.7***<br>(3.5e-05) | 3.5***<br>(6.5e-05)  | 1 ns<br>(0.43)           |
| Treatment*Genotype<br>df=14 | 0.7 ns<br>(0.74)     | 0.6 ns<br>(0.90)   | 0.6 ns<br>(0.83)    | 0.6 ns<br>(0.83)     | 0.8 ns<br>(0.69)         |

**Table S3 - Mean and one standard error of seedling traits in control and auxin hormone treatments at 14 and 21 days.**

| <b>Collection Time</b> | <b>Treatment</b> | <b>Rosette Diam. (mm) ±SE</b> | <b>Root Length (cm) ±SE</b> | <b>Below Mass (mg) ±SE</b> | <b>Above Mass (mg) ±SE</b> | <b>LR Density (#/cm) ±SE</b> |
|------------------------|------------------|-------------------------------|-----------------------------|----------------------------|----------------------------|------------------------------|
| 14d                    | Control          | 14.5±0.5                      | 38.2±3.3                    | 2.2±0.1                    | 0.28±0.01                  | 3.3±0.2                      |
| 14d                    | Auxin            | 11.7±0.4                      | 29.1±2.1                    | 1.3±0.1                    | 0.25±0.01                  | 4.5±0.3                      |
| 21d                    | Control          | 24.5±0.5                      | 128.6±6.2                   | 11.8±0.5                   | 1.13±0.54                  | 4.9±0.2                      |
| 21d                    | Auxin            | 23.3±0.4                      | 127.1±6.0                   | 7.0±0.3                    | 1.16±0.31                  | 6.5±0.2                      |

**Table S4 - Analysis of variance examining the fixed effects of hormone treatment, genotype, and their interaction in 21d SALK insert mutant seedlings.** Values are F-statistic results of linear models, and significance levels are indicated by  $p < 0.001 = ***$ ,  $p < 0.01 = **$ ,  $p < 0.05 = *$ ,  $p > 0.05 = ns$  with exact p-values noted in parentheses. Belowground mass, aboveground mass, and LR density have been square root transformed and rosette diameter log-transformed to meet assumptions.

| <b>Fixed Effect</b>         | <b>Rosette Diam.</b> | <b>Root Length</b>  | <b>Below Mass</b>   | <b>Above Mass</b>     | <b>LR Density</b>      |
|-----------------------------|----------------------|---------------------|---------------------|-----------------------|------------------------|
| Treatment<br>df=1           | 1.9 ns<br>(0.1730)   | 0.03 ns<br>(0.8684) | 0.2 ns<br>(0.64722) | 45.5***<br>(4.48e-10) | 27.9***<br>(5.715e-07) |
| Genotype<br>df=14           | 0.9 ns<br>(0.5697)   | 1.0 ns<br>(0.4765)  | 1.6 ns<br>(0.07974) | 1.3 ns<br>(0.1983)    | 1.3 ns<br>(0.1892)     |
| Treatment*Genotype<br>df=14 | 0.6 ns<br>(0.8372)   | 0.6 ns<br>(0.8834)  | 0.9 ns<br>(0.60353) | 0.9 ns<br>(0.6055)    | 0.5 ns<br>(0.9140)     |

**Table S5 - Analysis of variance examining the fixed effects of hormone treatment, genotype, and their interaction in mature SALK insert mutants.** Values are F-statistic results of linear models, and significance levels are indicated by  $p < 0.001 = ***$ ,  $p < 0.01 = **$ ,  $p < 0.05 = *$ ,  $p > 0.05 = ns$  with exact p-values noted in parentheses. Inflorescence height has been log-transformed and fruit number, days to bolt, and days to flower square root transformed to meet assumptions. The tray random effect term refers to plant plug trays and was included to account for random differences across our block design. Likelihood ratio test statistics are reported for random effects with exact p-values in parentheses.

| <b>Fixed Effect</b>   | <b>Diam. at Bolt</b> | <b>Root Length</b>       | <b>Below Mass</b>    | <b>Above Mass</b>     | <b>Infl. Height</b>   | <b>Infl. Branchin</b> |
|-----------------------|----------------------|--------------------------|----------------------|-----------------------|-----------------------|-----------------------|
| Treatment<br>df=1     | 15.2***<br>(0.00015) | 45.6***<br>(3.9e-10)     | 84.5***<br>(5.6e-16) | 15.6***<br>(0.00013)  | 10.3**<br>(0.0017)    | 0.8 ns<br>(0.38)      |
| Genotype<br>df=14     | 0.8 ns<br>(0.67)     | 1.5 ns<br>(0.11)         | 1.3 ns<br>(0.19)     | 1.1 ns<br>(0.37)      | 1.9*<br>(0.035)       | 1.0 ns<br>(0.42)      |
| Treat.*Geno.<br>df=14 | 1.5 ns<br>(0.11)     | 1.4 ns<br>(0.16)         | 1.6 ns<br>(0.084)    | 1.5 ns<br>(0.11)      | 1.7 ns<br>(0.073)     | 1.2 ns<br>(0.27)      |
| <b>Rand. Effect</b>   | 13.7                 | 26.7                     | 32.3                 | 36.0                  | 18.4                  | 18.0                  |
| Tray<br>df=1          | ***<br>(0.00021)     | ***<br>(2.4e-07)         | ***<br>(1.3e-08)     | ***<br>(2.0e-09)      | ***<br>(1.8e-05)      | ***<br>(2.2e-05)      |
| <b>Fixed Effect</b>   | <b>Fruit Number</b>  | <b>Avg. Fruit Length</b> | <b>Days to Bolt</b>  | <b>Days to Flower</b> | <b>Days to Mature</b> |                       |
| Treatment<br>df=1     | 0.2 ns<br>(0.69)     | 27***<br>(7.3e-07)       | 24.6***<br>(2.0e-06) | 16.3***<br>(9.2e-05)  | 11.1***<br>(0.0011)   |                       |
| Genotype<br>df=14     | 1.3 ns<br>(0.21)     | 1.9*<br>(0.026)          | 1.8*<br>(0.037)      | 2.2**<br>(0.0091)     | 2.1*<br>(0.015)       |                       |
| Treat.*Geno.<br>df=14 | 1.3 ns<br>(0.23)     | 1.4 ns<br>(0.17)         | 1.3 ns<br>(0.20)     | 2.1*<br>(0.017)       | 1.3 ns<br>(0.24)      |                       |
| <b>Rand. Effect</b>   | 46.0                 | 1.8                      | 2.2                  | 3.9                   | 4.9                   |                       |
| Tray<br>df=1          | ***<br>(1.2e-11)     | ns<br>(0.18)             | ns<br>(0.14)         | *<br>(0.049)          | *<br>(0.027)          |                       |

**Table S6 - Mean and one standard error of traits measured in mature adult plants in control and auxin hormone treatments.** Bold mean values indicate a significant difference between treatments.

| <u>Collection Time</u> | <u>Treatment</u> | <b>Diam. at Bolt (mm) ±SE</b> | <b>Root Length (cm) ±SE</b>       | <b>Below Mass (mg) ±SE</b>              | <b>Above Mass (mg) ±SE</b> | <b>Germinati on Day ±SE</b> | <b>Infl. Height (cm) ±SE</b> | <b>Infl. Branch ±SE</b> |
|------------------------|------------------|-------------------------------|-----------------------------------|-----------------------------------------|----------------------------|-----------------------------|------------------------------|-------------------------|
| Mature                 | Control          | <b>20.5±0.5</b>               | <b>233.6±15.0</b>                 | <b>2.4±0.1</b>                          | <b>33.2±1.6</b>            | 2.6±0.1                     | <b>21.5±0.5</b>              | 3.4±0.3                 |
| Mature                 | Auxin            | <b>23.5±0.6</b>               | <b>366.4±15.3</b>                 | <b>4.3±0.2</b>                          | <b>41.4±1.6</b>            | 2.7±0.1                     | <b>23.8±0.4</b>              | 3.1±0.2                 |
| <u>Collection Time</u> | <u>Treatment</u> | <b>Fruit Number ±SE</b>       | <b>Avg. Fruit Length (mm) ±SE</b> | <b>Fitness (fruit no. / length) ±SE</b> | <b>Days to Bolt ±SE</b>    | <b>Days to Flower ±SE</b>   | <b>Days to Mature ±SE</b>    |                         |
| Mature                 | Control          | 22.7±1.0                      | <b>10.5±0.2</b>                   | 248.8±12.1                              | <b>25.0±0.6</b>            | <b>29.1±0.6</b>             | <b>44.5±0.5</b>              |                         |
| Mature                 | Auxin            | 21.7±0.9                      | <b>11.7±0.1</b>                   | 257.0±11.9                              | <b>28.0±0.3</b>            | <b>31.5±0.3</b>             | <b>47.0±0.3</b>              |                         |

**Table S7 - Analysis of variance examining the fixed effects of genotype, and developmental stage by genotype interaction for 14d and 21d seedlings.** Values are F-statistic results of linear models, and significance levels are indicated by  $p < 0.001 = ***$ ,  $p < 0.01 = **$ ,  $p < 0.05 = *$ ,  $p > 0.05 = ns$  with exact p-values noted in parentheses. Belowground mass, aboveground mass, and LR density have been square root transformed and rosette diameter as well as root length have been log-transformed to meet assumptions. Likelihood ratio test statistics are reported for random effects with exact p-values in parentheses.

| <i>Control:</i>                          |                      |                     |                     |                     |                   |
|------------------------------------------|----------------------|---------------------|---------------------|---------------------|-------------------|
| <b>Fixed Effect</b>                      | <b>Rosette Diam.</b> | <b>Root Length</b>  | <b>Below Mass</b>   | <b>Above Mass</b>   | <b>LR Density</b> |
| Genotype<br>df=20                        | 3.1***<br>(2.9e-05)  | 3.4***<br>(4.4e-06) | 3.2***<br>(1.6e-05) | 3.3***<br>(7.6e-06) | 0.9 ns<br>(0.65)  |
| Developmental<br>Stage*Genotype<br>df=20 | 1.1 ns<br>(0.36)     | 1.0 ns<br>(0.47)    | 1.5 ns<br>(0.10)    | 0.9 ns<br>(0.53)    | 0.7 ns<br>(0.86)  |
| <i>Auxin:</i>                            |                      |                     |                     |                     |                   |
| <b>Fixed Effect</b>                      | <b>Rosette Diam.</b> | <b>Root Length</b>  | <b>Below Mass</b>   | <b>Above Mass</b>   | <b>LR Density</b> |
| Genotype<br>df=20                        | 2.9***<br>(6.8e-05)  | 2.7***<br>(0.00026) | 2.8***<br>(0.00011) | 1.5 ns<br>(0.079)   | 1.2 ns<br>(0.24)  |
| Developmental<br>Stage*Genotype<br>df=20 | 1.3 ns<br>(0.19)     | 1.0 ns<br>(0.52)    | 1.1 ns<br>(0.31)    | 0.8 ns<br>(0.66)    | 2.1**<br>(0.0059) |

**Table S8 – Analysis of Variance examining the fixed effects of hormone treatment, genotype, and their interaction in mature plants.** All traits have been scaled according to their developmental stage and treatment such that developmental stage\*genotype effects represent changes in rank order of genotypes but not different magnitudes or direction of difference. Values are F-statistic results of linear models, and significance levels are indicated by  $p < 0.001 = ***$ ,  $p < 0.01 = **$ ,  $p < 0.05 = *$ ,  $p > 0.05 = ns$  with exact p-values noted in parentheses. The tray random effect term refers to plant plug trays and was included to account for random differences across our block design. Likelihood ratio test statistics are reported with exact p-values in parentheses.

| <i>Control:</i>                           |                            |                            |                            |
|-------------------------------------------|----------------------------|----------------------------|----------------------------|
| <b><u>Fixed Effect</u></b>                | <b>Root Length</b>         | <b>Below Mass</b>          | <b>Above Mass</b>          |
| Developmental Stage (df=2)                | 0.1 ns<br>(0.94)           | 0.03 ns<br>(0.97)          | 0.1 ns<br>(0.92)           |
| Genotype (df=20)                          | 3.8***<br>(1.9e-07)        | 2.6***<br>(0.00034)        | 2.5***<br>(0.00054)        |
| Develop. Stage *Genotype (df=40)          | 1.1 ns<br>(0.3)            | 1.8**<br>(0.0045)          | 1.6*<br>(0.021)            |
| <b><u>Rand. Effect</u></b><br>Tray (df=1) | 27.7***<br>(1.4e-07)       | 5.2*<br>(0.022)            | 7.1**<br>(0.0078)          |
| <i>Auxin:</i>                             |                            |                            |                            |
| <b><u>Fixed Effect</u></b>                | <b>Root Length</b>         | <b>Below Mass</b>          | <b>Above Mass</b>          |
| Developmental Stage (df=2)                | 0.089 ns<br>(0.92)         | 0.1 ns<br>(0.90)           | 0.14 ns<br>(0.87)          |
| Genotype (df=20)                          | 4.6***<br>(1.2e-09)        | 2.6***<br>(0.00024)        | 1.3 ns<br>(0.19)           |
| Developmental Stage *Genotype (df=40)     | 1.4 ns<br>(0.078)          | 1.6*<br>(0.012)            | 1.1 ns<br>(0.29)           |
| <b><u>Rand. Effect</u></b><br>Tray (df=1) | 124.2***<br>( $<2.2e-16$ ) | 71.2 ***<br>( $<2.2e-16$ ) | 80.3 ***<br>( $<2.2e-16$ ) |

**Table S9 – Analysis of Variance examining the fixed effects of developmental stage, APA group (0, 1+2, or >2) and their interaction in mature SALK insert mutants.** All traits have been scaled according to their developmental stage and treatment such that developmental stage\*APA group effects represent changes in rank order of APA groups but not different magnitudes or direction of difference. Values are F-statistic results of linear models, and significance levels are indicated by p<0.001=\*\*\*, p<0.01=\*\*, p<0.05=\*, p>0.05=ns with exact p-values note in parentheses. The tray random effect term refers to plant plug trays and was included to account for the block design. Likelihood ratio test statistics are reported with exact p-values in parentheses.

| <i>Control:</i>                       |                       |                      |                       |
|---------------------------------------|-----------------------|----------------------|-----------------------|
| <b><u>Fixed Effect</u></b>            | <b>Root Length</b>    | <b>Below Mass</b>    | <b>Above Mass</b>     |
| Developmental Stage (df=2)            | 0.06 ns<br>(0.94)     | 0.03 ns<br>(0.97)    | 0.03 ns<br>(0.97)     |
| APA Group (df=2)                      | 0.04 ns<br>(0.96)     | 0.06 ns<br>(0.94)    | 0.23 ns<br>(0.79)     |
| Develop. Stage *APA Group (df=4)      | 1.8 ns<br>(0.13)      | 2.2 ns<br>(0.073)    | 1.7 ns<br>(0.15)      |
| <b><u>Rand. Effect</u></b>            | 15.5***<br>(8.2e-05)  | 0.55 ns<br>(0.46)    | 4.6*<br>(0.031)       |
| <i>Auxin:</i>                         |                       |                      |                       |
| <b><u>Fixed Effect</u></b>            | <b>Root Length</b>    | <b>Below Mass</b>    | <b>Above Mass</b>     |
| Developmental Stage (df=2)            | 0.1 ns<br>(0.91)      | 0.04 ns<br>(0.95)    | 0.04 ns<br>(0.97)     |
| APA Group (df=2)                      | 3.3*<br>(0.040)       | 7.1**<br>(0.0010)    | 4.9**<br>(0.0082)     |
| Developmental Stage *APA Group (df=4) | 0.7 ns<br>(0.60)      | 0.8 ns<br>(0.52)     | 1.6 ns<br>(0.18)      |
| <b><u>Rand. Effect</u></b>            | 94.8***<br>(<2.2e-16) | 50.2***<br>(1.4e-12) | 72.0***<br>(<2.2e-16) |

**Table S10 - Mean and one standard error of root length, belowground mass, and aboveground mass of all PA groups (0 = no APA sites, 1+2 = 1 or 2 APA sites, >2 = more than 2 APA sites in mutant gene) in control and auxin treatments across all developmental stages.**

| <u>Collection Time</u> | <u>Treatment</u> | <u>PA Group</u> | <u>Root Length (cm) ±SE</u> | <u>Below Mass (mg) ±SE</u> | <u>Above Mass (mg) ±SE</u> |
|------------------------|------------------|-----------------|-----------------------------|----------------------------|----------------------------|
| 14d                    | control          | 0               | 40.4±3.4                    | 0.31±0.02                  | 2.28±0.18                  |
| 14d                    | control          | 1+2             | 39.8±3.2                    | 0.29±0.02                  | 2.36±0.19                  |
| 14d                    | control          | >2              | 33.7±2.9                    | 0.25±0.02                  | 1.87±0.20                  |
| 14d                    | IAA              | 0               | 29.2±2.7                    | 0.24±0.02                  | 1.30±0.10                  |
| 14d                    | IAA              | 1+2             | 33.2±4.1                    | 0.29±0.02                  | 1.42±0.13                  |
| 14d                    | IAA              | >2              | 22.4±3.1                    | 0.19±0.02                  | 1.02±0.11                  |
| 21d                    | control          | 0               | 119.1±9.2                   | 0.99±0.07                  | 10.88±0.79                 |
| 21d                    | control          | 1+2             | 127.8±10.3                  | 1.18±0.09                  | 12.09±0.94                 |
| 21d                    | control          | >2              | 142.0±13.2                  | 1.26±0.11                  | 12.52±1.11                 |
| 21d                    | IAA              | 0               | 114.5±7.6                   | 1.04±0.06                  | 6.33±0.33                  |
| 21d                    | IAA              | 1+2             | 137.2±11.1                  | 1.35±0.10                  | 8.02±0.59                  |
| 21d                    | IAA              | >2              | 129.2±12.2                  | 1.08±0.10                  | 6.38±0.63                  |
| fruit                  | control          | 0               | 254.0±26.7                  | 2.59±0.26                  | 36.20±2.99                 |
| fruit                  | control          | 1+2             | 211.8±22.3                  | 2.22±0.19                  | 30.81±2.45                 |
| fruit                  | control          | >2              | 239.3±30.3                  | 2.59±0.33                  | 32.83±3.28                 |
| fruit                  | IAA              | 0               | 335.5±25.4                  | 4.02±0.26                  | 38.69±2.63                 |
| fruit                  | IAA              | 1+2             | 385.7±23.0                  | 4.44±0.27                  | 42.29±2.48                 |
| fruit                  | IAA              | >2              | 375.7±33.3                  | 4.29±0.34                  | 43.54±3.33                 |



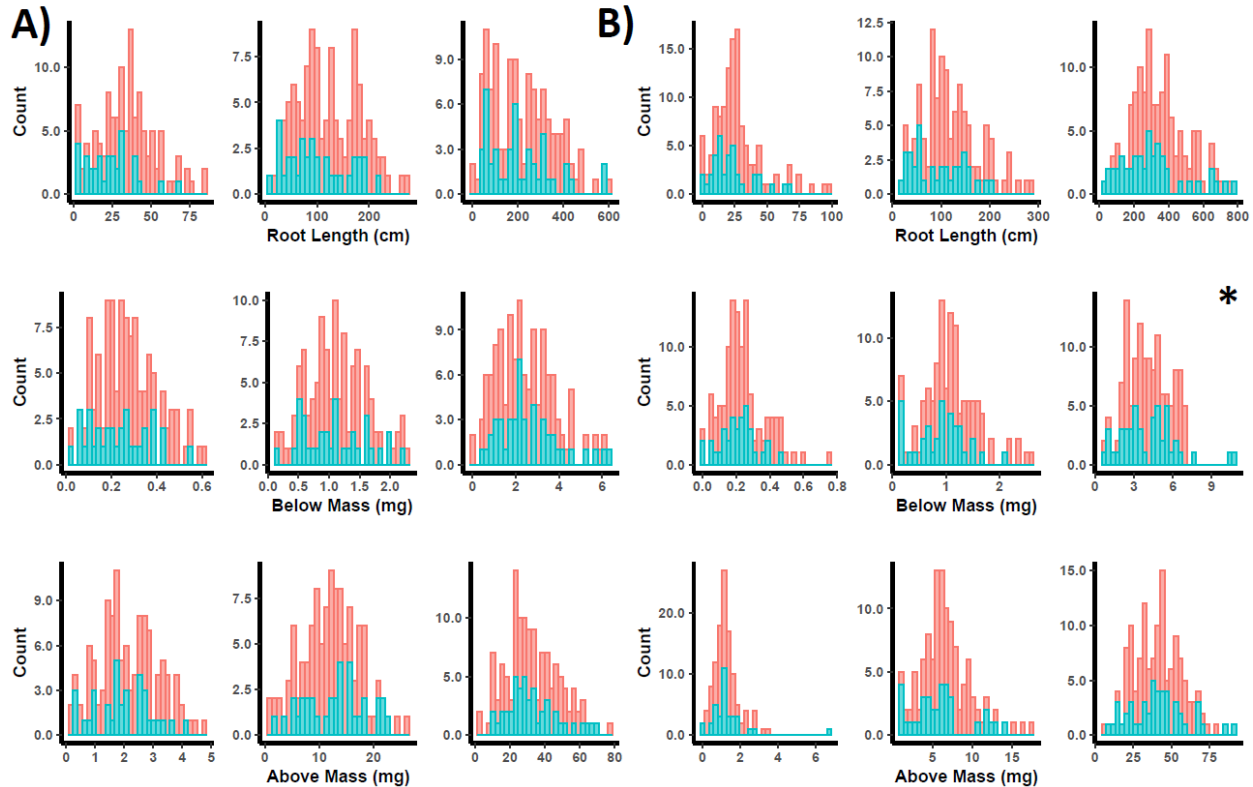

**Figure S5 - Distribution of major growth traits in both treatments (control in A and auxin in B) across all life stages (14d, 21d, and mature adult left to right) for insert mutants (pink) and natural accessions (blue).** Significant difference in variation between natural accessions and insert mutants determined via Levene's tests are noted by an \* (df = 1, F value = 3.98,  $p=0.0481$ ).

## References

- Cheng, C. Y., Krishnakumar, V., Chan, A. P., Thibaud-Nissen, F., Schobel, S., & Town, C. D. (2017). Araport11: a complete reannotation of the *Arabidopsis thaliana* reference genome. *The Plant Journal*, *89*(4), 789-804.
- Duenas, M. A., Hemming, D. J., Roberts, A., & Diaz-Soltero, H. (2021). The threat of invasive species to IUCN-listed critically endangered species: A systematic review. *Global Ecology and Conservation*, *26*, e01476.
- Hong, L., Ye, C., Lin, J., Fu, H., Wu, X., & Li, Q. Q. (2018). Alternative polyadenylation is involved in auxin-based plant growth and development. *The Plant Journal*, *93*(2), 246-258.
- Moher, D., Liberati, A., Tetzlaff, J., Altman, D. G., & PRISMA Group\*. (2009). Preferred reporting items for systematic reviews and meta-analyses: the PRISMA statement. *Annals of Internal Medicine*, *151*(4), 264-269.
- Rutter, M. T., Murren, C. J., Callahan, H. S., Bisner, A. M., Leebens-Mack, J., Wolyniak, M. J., & Strand, A. E. (2019). Distributed phenomics with the unPAK project reveals the effects of mutations. *The Plant Journal*, *100*(1), 199-211.
- Zhu, S., Ye, W., Ye, L., Fu, H., Ye, C., Xiao, X., ... & Wu, X. (2020). PlantAPAdb: a comprehensive database for alternative polyadenylation sites in plants. *Plant Physiology*, *182*(1), 228-242.
